# Supplementary material for: Ascorbic acid stimulates the in vitro myoblast proliferation and migration of pacu (Piaractus mesopotamicus)
Source: PubMed Central journal article supplement (PMC6379551; doi:10.1038/s41598-019-38536-4), 2019-02-18
Supplement: 41598_2019_38536_MOESM1_ESM.pdf [file 41598_2019_38536_MOESM1_ESM.pdf]

**Ascorbic acid stimulates the *in vitro* myoblast proliferation and migration of pacu (*Piaractus mesopotamicus*).**

Bruno Oliveira Silva Duran<sup>1</sup>, Guilherme Alcarás Góes<sup>1</sup>, Bruna Tereza Thomazini Zanella<sup>1</sup>, Paula Paccielli Freire<sup>1</sup>, Jessica Silvino Valente<sup>1</sup>, Rondinelle Artur Simões Salomão<sup>2</sup>, Ana Fernandes<sup>3</sup>, Edson Assunção Mareco<sup>2</sup>, Robson Francisco Carvalho<sup>1</sup> and Maeli Dal-Pai-Silva<sup>1\*</sup>

<sup>1</sup>São Paulo State University (UNESP), Institute of Biosciences, Department of Morphology, Botucatu, São Paulo, Brazil

<sup>2</sup>University of West São Paulo (UNOESTE), Presidente Prudente, São Paulo, Brazil

<sup>3</sup>São Paulo State University (UNESP), Institute of Biosciences, Department of Chemistry and Biochemistry, Botucatu, São Paulo, Brazil

\* Corresponding author

E-mail: maeli@ibb.unesp.br

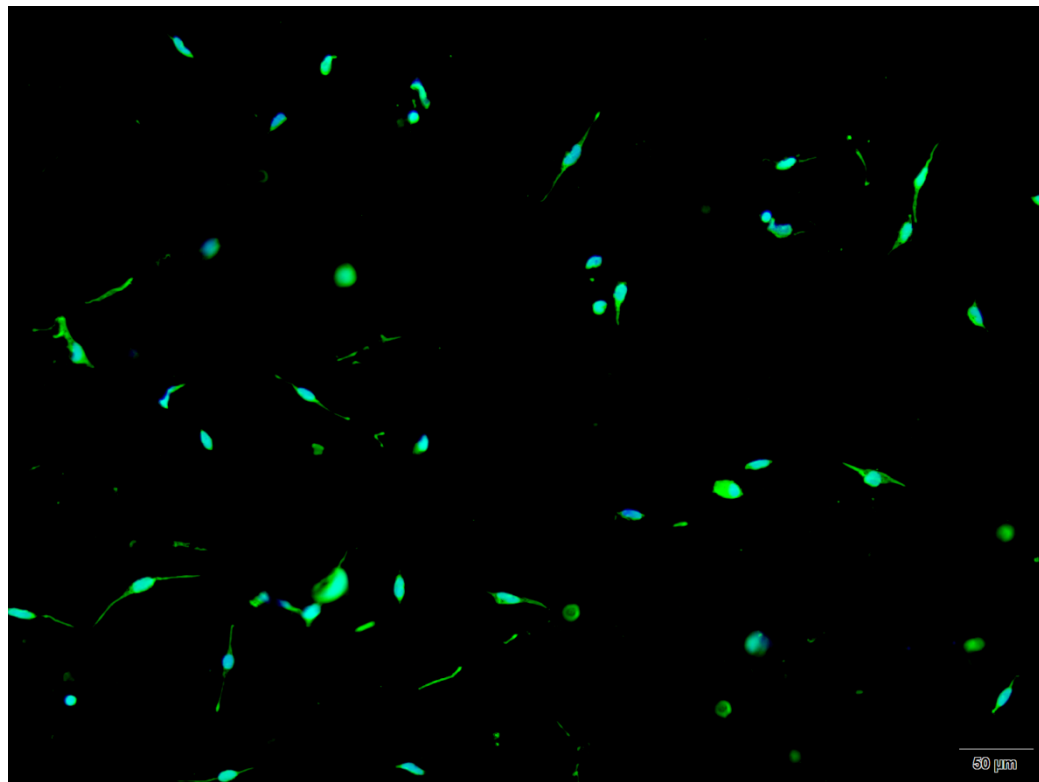

**Day 1**

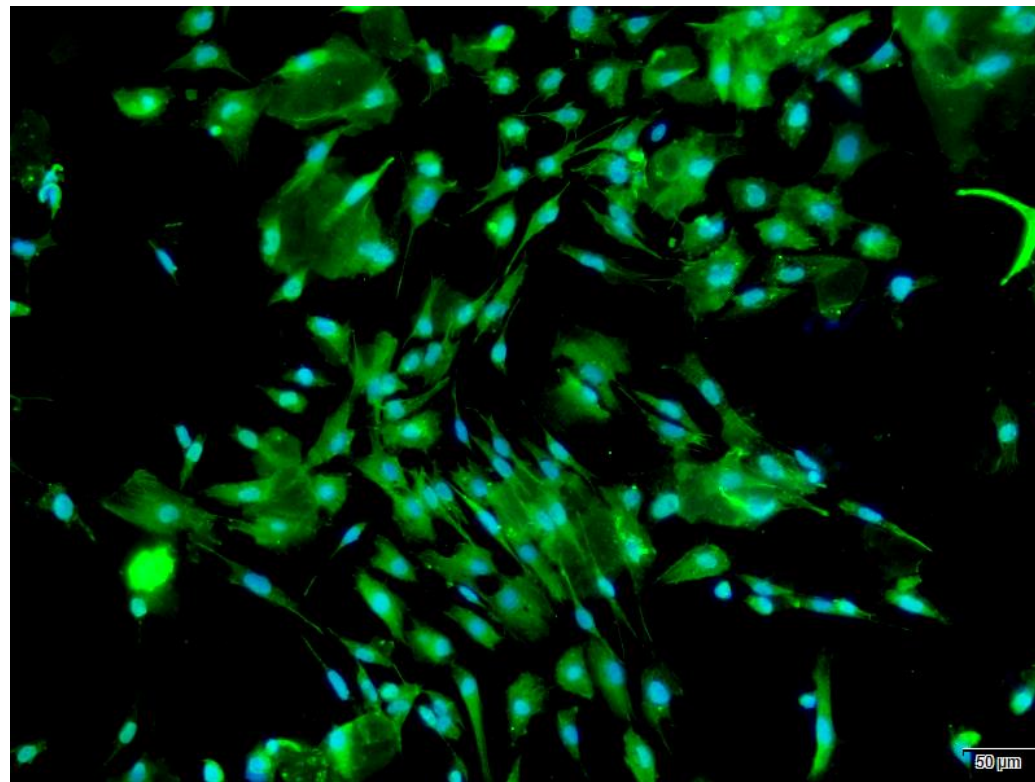

**Day 3**

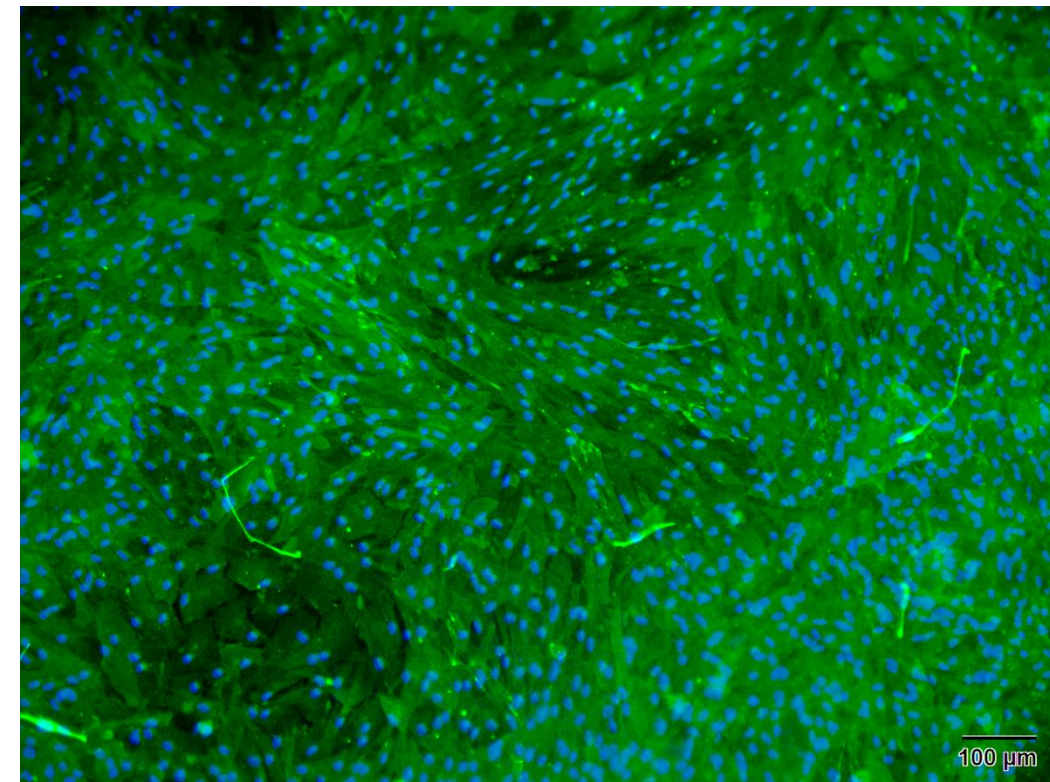

**Day 7**

**Supplementary Fig S1. Immunofluorescence of myoblast cell cultures established using fast-twitch skeletal muscle from juvenile pacus.** The myogenic cells were identified by immunostaining for desmin (green) and the cells nuclei were counterstained with DAPI (blue) on days 1, 3 and 7 of cell culture. The images were obtained under a fluorescence microscope (days 1 and 3 - 20x magnification; Bars: 50 µm; day 7 - 10x magnification; Bar: 100 µm).

A

### Trypan blue exclusion

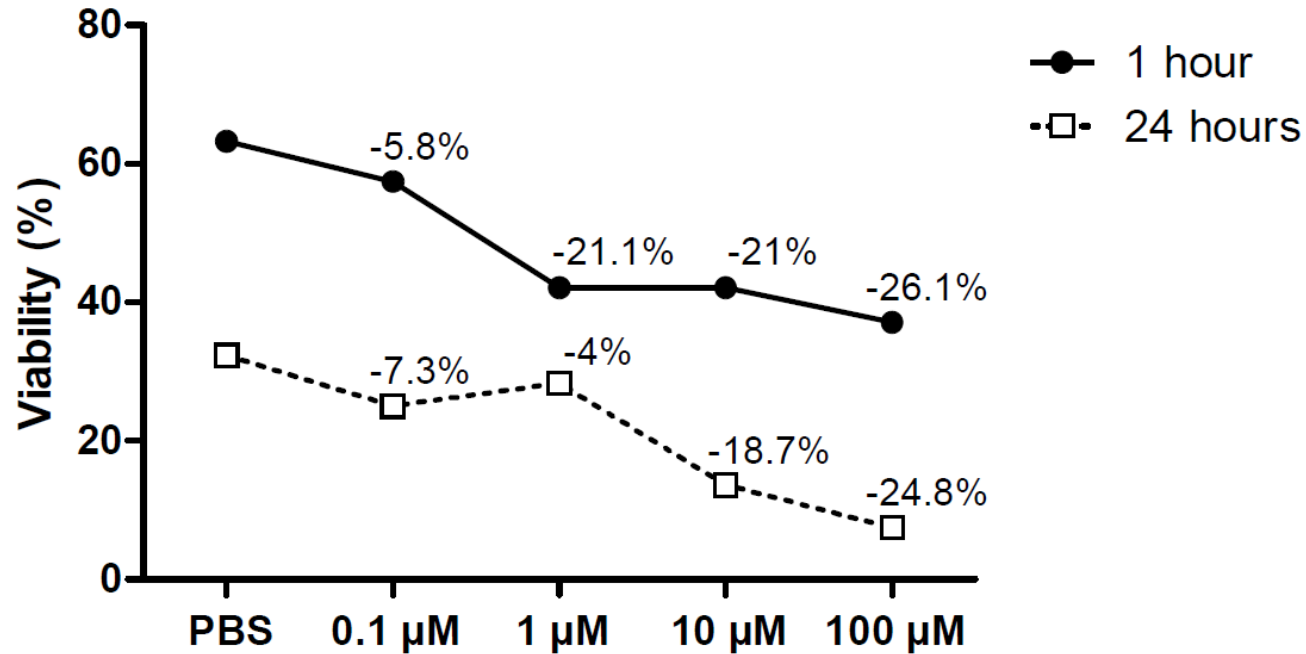

B

### MTT assay

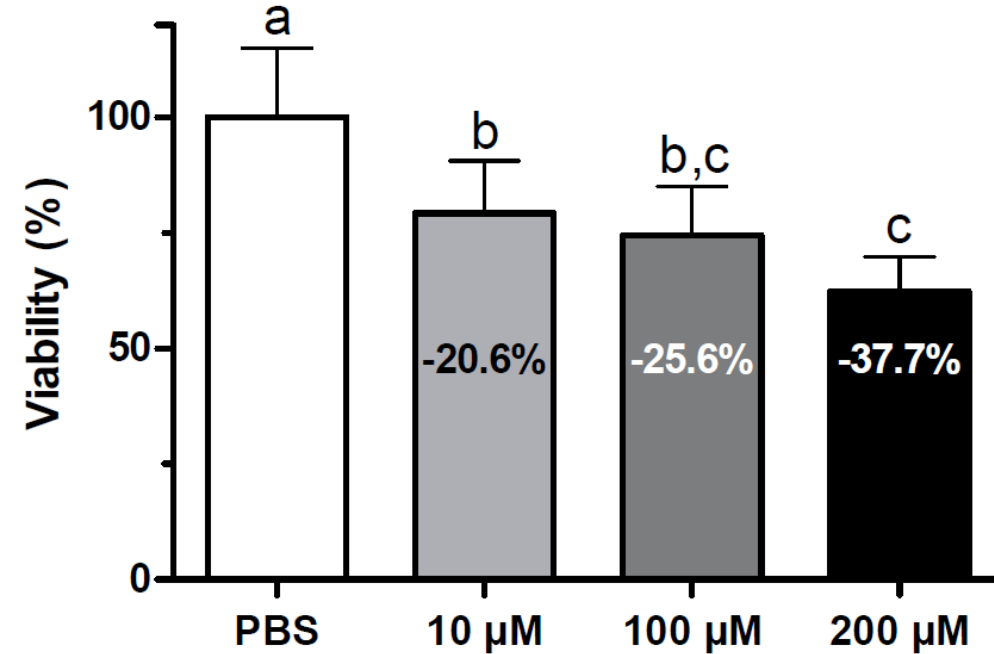

**Supplementary Fig S2. The effect of menadione treatment on myoblast viability.** (A) Trypan blue exclusion assay. Myoblasts were incubated with PBS or menadione at 0.1, 1, 10 and 100  $\mu\text{M}$  for 1 and 24 hours. The stained (dead) and unstained (live) myoblasts were counted and cell viability expressed as a percentage of the total number of cells. (B) MTT assay. Myoblasts were incubated with PBS or menadione at 10, 100 and 200  $\mu\text{M}$  for 1 hour. The data are expressed as a percentage and presented as the mean  $\pm$  SD of duplicates from four independent cell cultures. The different letters indicate significant differences among the groups ( $p < 0.05$  - One-way ANOVA test, followed by Tukey's multiple comparisons test).

*myod1*

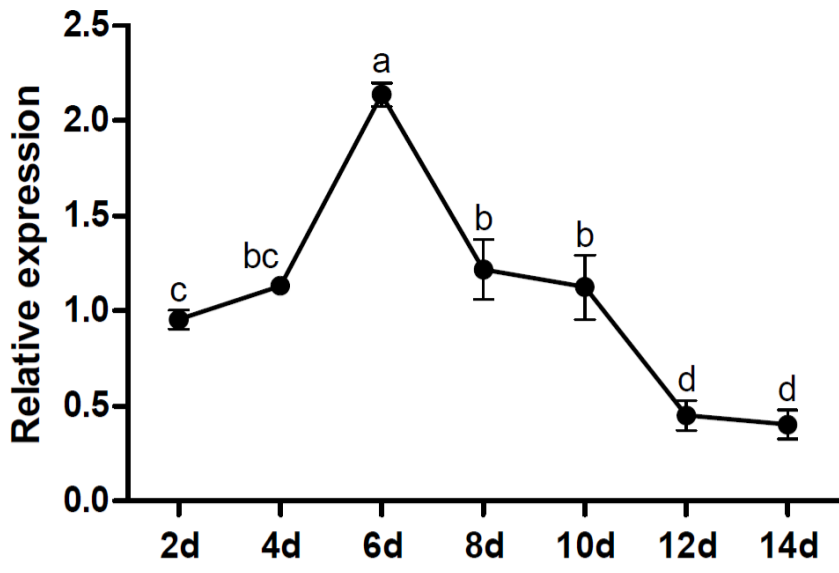

*myog*

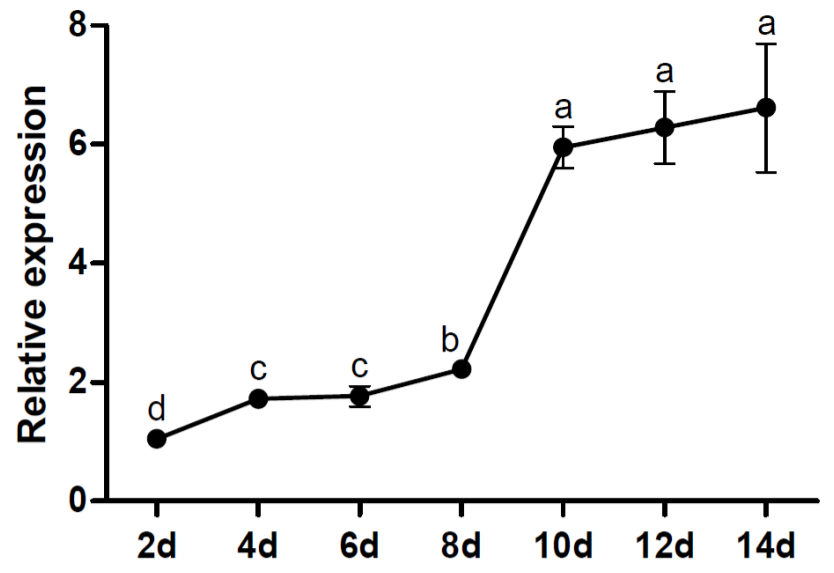

*igf1*

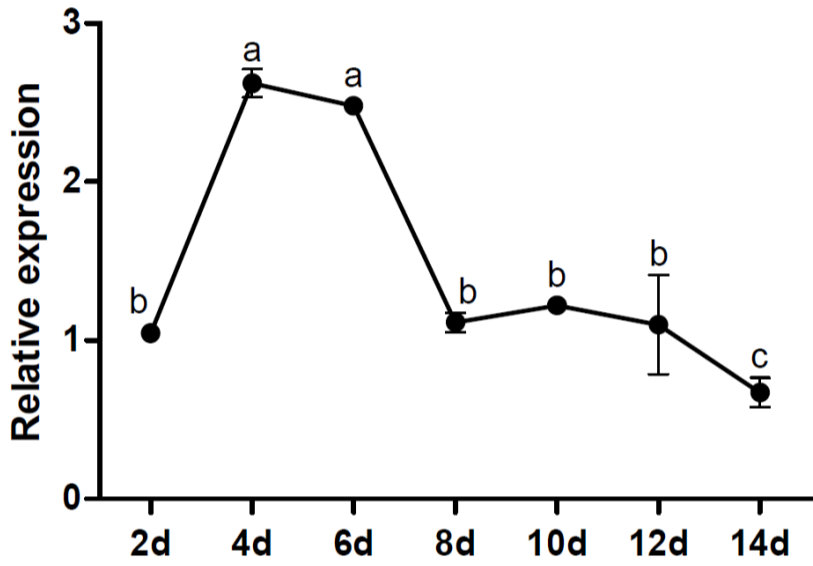

*mtor*

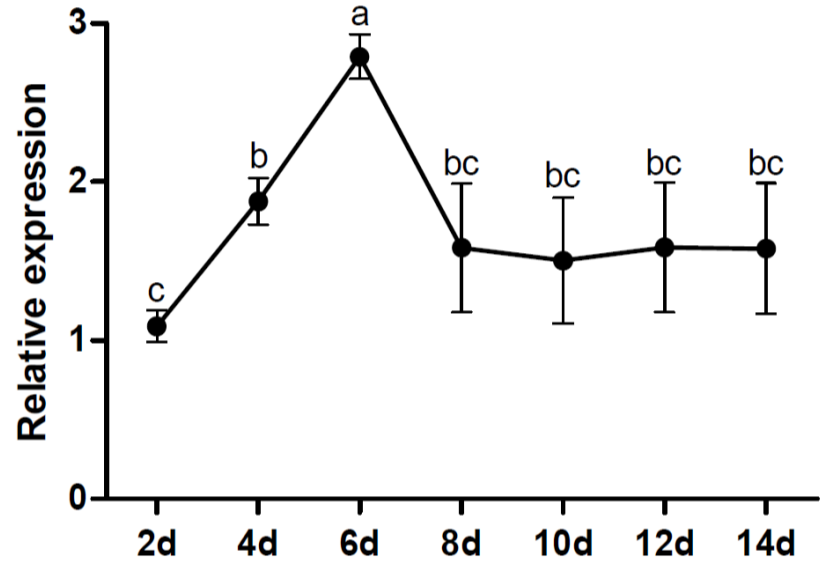

*fbxo32*

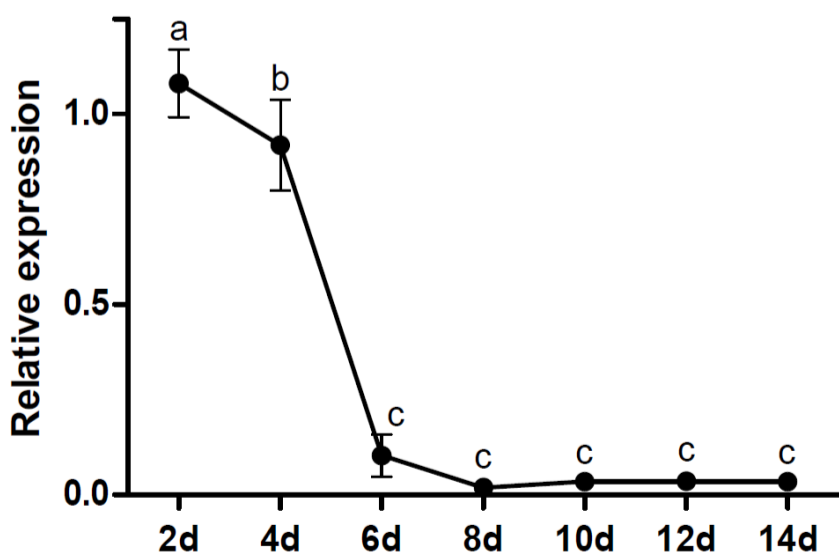

**Supplementary Fig S3. Relative mRNA expression of *myod1*, *myog*, *igf1*, *mtor* and *fbxo32* through cell culture development.** *myod1*, *myog*, *igf1*, *mtor* and *fbxo32* mRNA expression was assessed by qPCR in myoblast cell cultures on days 2, 4, 6, 8, 10, 12 and 14 of cell culture (d=days). The data are expressed as the fold change compared with 2d and presented as the mean  $\pm$  SD of duplicates from three independent cell cultures. The different letters indicate significant differences among the groups ( $p < 0.05$  - One-way ANOVA test, followed by Tukey's multiple comparisons test).
